# Supplementary material for: Synthesis and evaluation of sulfonyl-substituted ruthenium complex as potential antibacterial activity againstStaphylococcus aureus
Source: Royal Society of Chemistry journal article supplement (doi:10.1039/d2nj02117j), 2022-01-01
Supplement: d2nj02117j1.pdf [file d2nj02117j1.pdf]

## Supporting Information

### Synthesis and evaluation of sulfonyl-substituted Ruthenium-complex as potential antibacterial activity against *Staphylococcus aureus*

ChunYan. Zhang,<sup>a</sup> RuJian. Yu,<sup>a</sup> LiQiang. Wang,<sup>a</sup> HaiYan. Huang,<sup>a</sup> MengQi. Xiao,<sup>a</sup> XueMin. Duan,<sup>a</sup> JinTao.  
Wang,<sup>a\*</sup> Xiang Wen. Liao,<sup>a\*</sup> YanShi. Xiong<sup>a\*</sup>

<sup>a</sup> School of Pharmacy, Jiangxi Science & Technology Normal University, Nanchang,  
330013, China

#### CONTENTS

|                                    |          |
|------------------------------------|----------|
| <b>1. Characterizations</b> .....  | <b>1</b> |
| <b>2. Supporting Results</b> ..... | <b>8</b> |

## 1. Characterizations

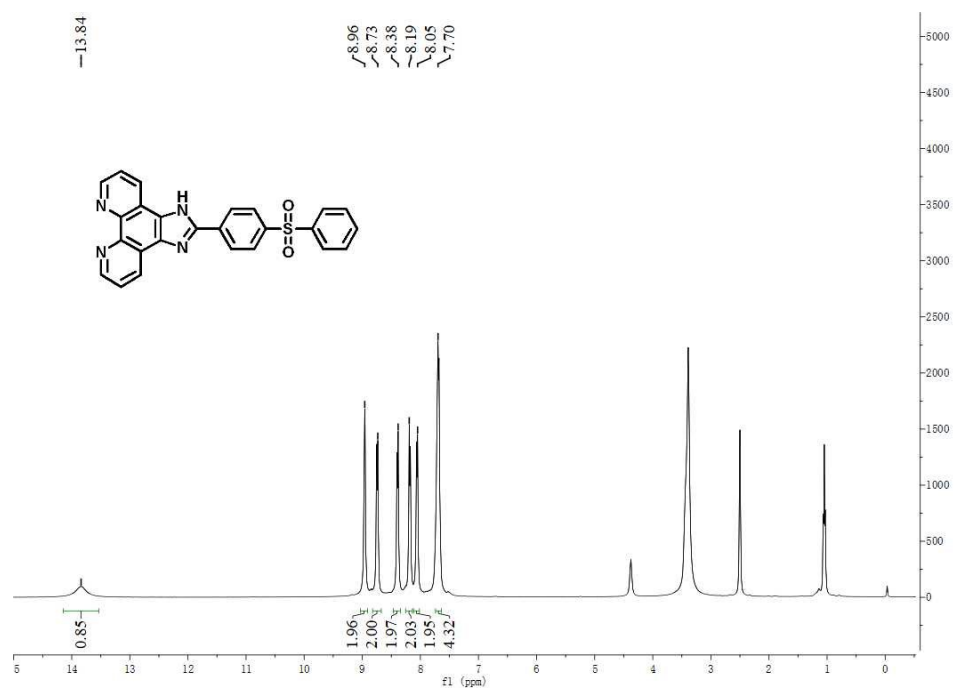

Figure 1.  $^1\text{H}$  NMR spectrum of the ligand PSPIP.

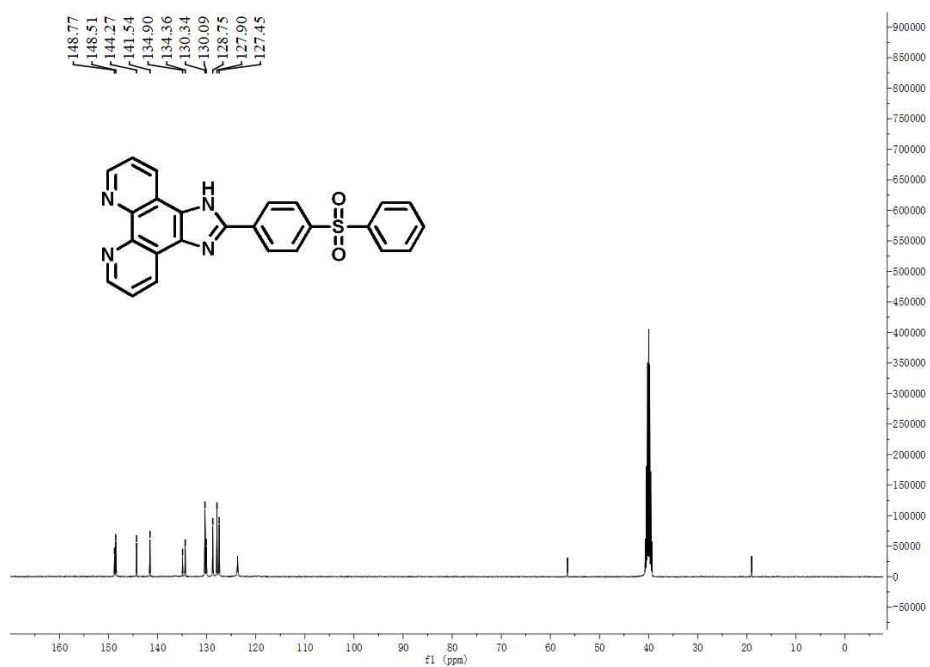

Figure 2.  $^{13}\text{C}$  NMR spectrum of the ligand PSPIP.

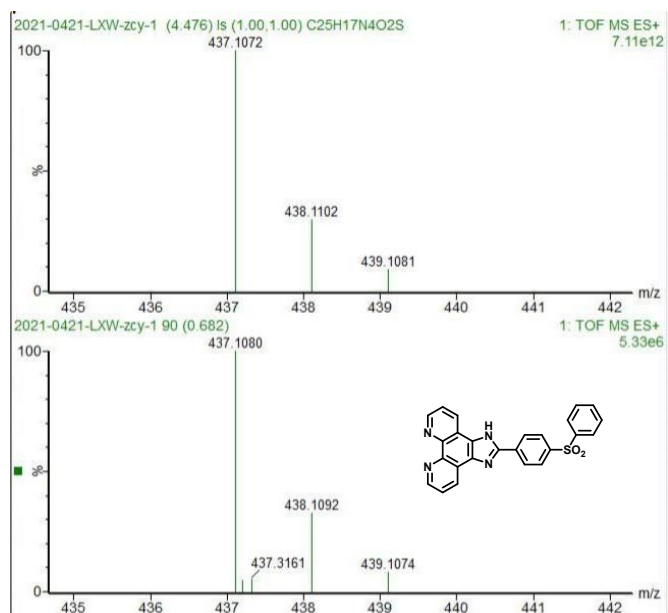

Figure 3. HRESI-MS spectrum of the ligand PSPIP.

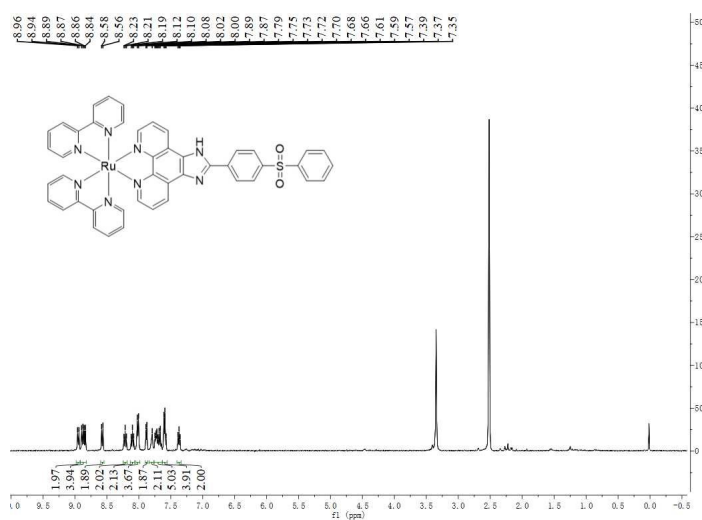

Figure 4. <sup>1</sup>H NMR spectrum of the Ru(II)-1.

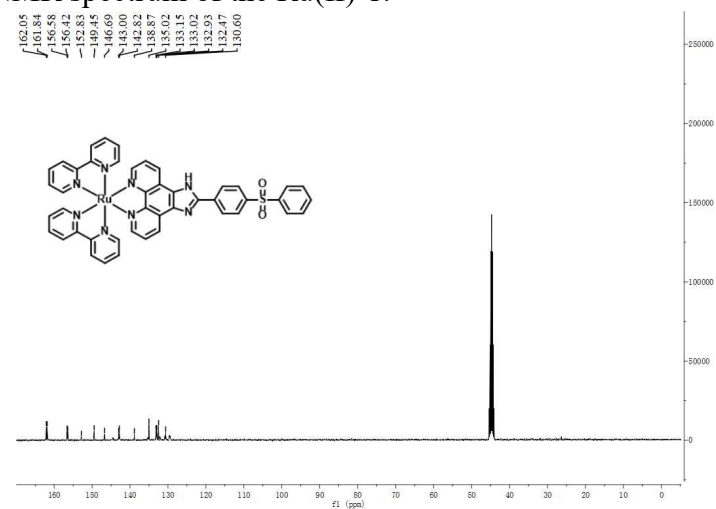

Figure 5. <sup>13</sup>C NMR spectrum of the Ru(II)-1.

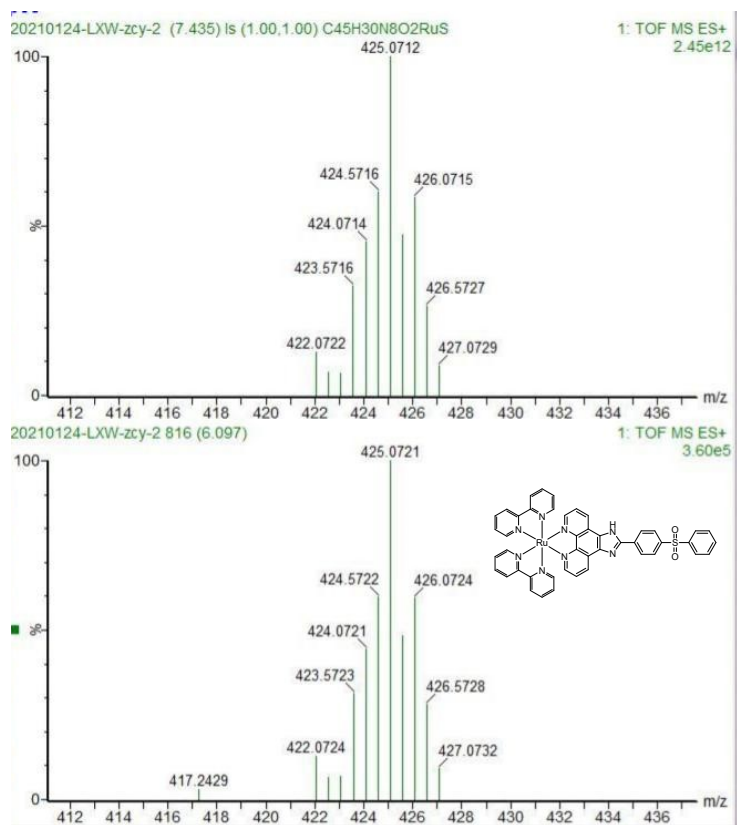

Figure 6. HRESI-MS spectrum of the Ru(II)-1.

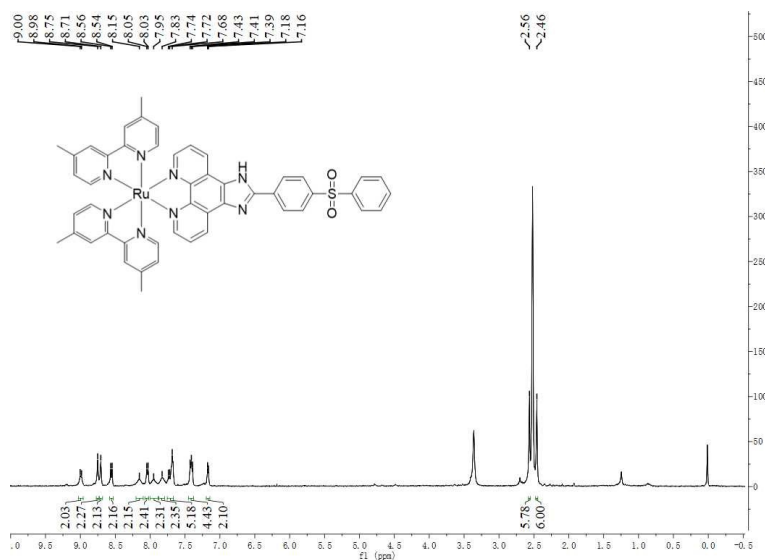

Figure 7. <sup>1</sup>H NMR spectrum of the Ru(II)-2.

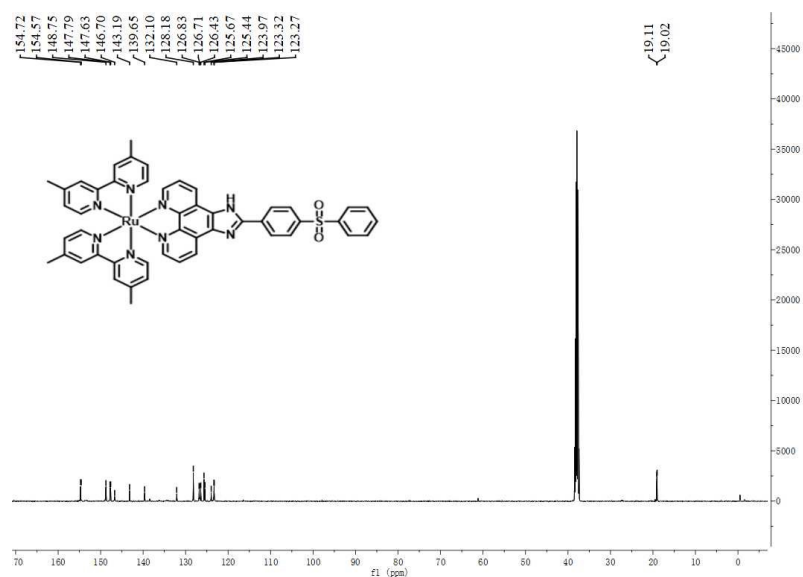

Figure 8.  $^{13}\text{C}$  NMR spectrum of the Ru(II)-2.

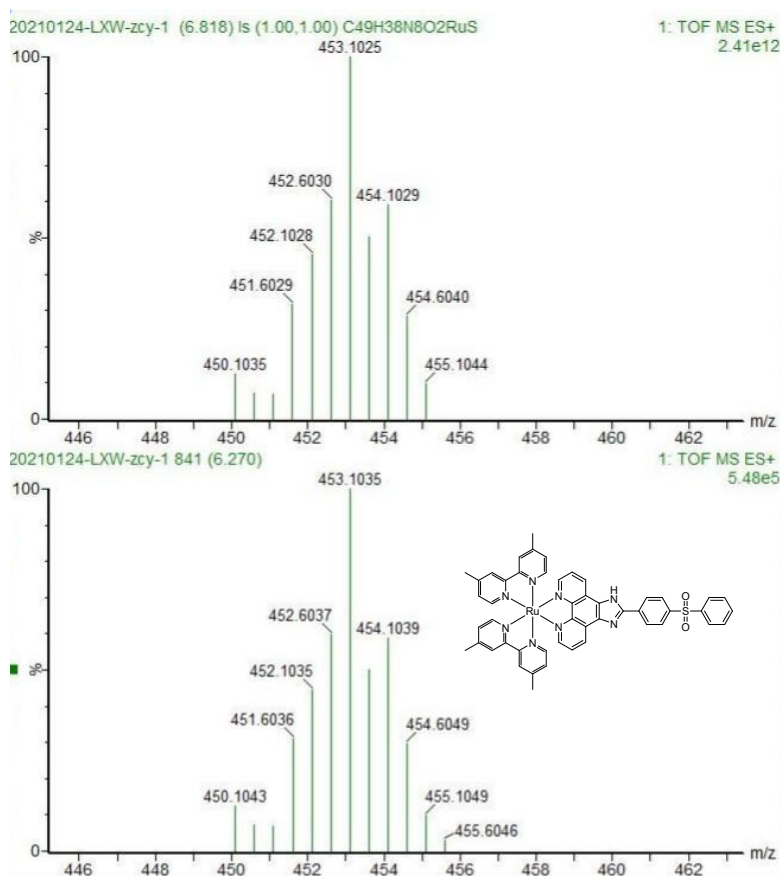

Figure 9. HRESI-MS spectrum of the Ru(II)-2.

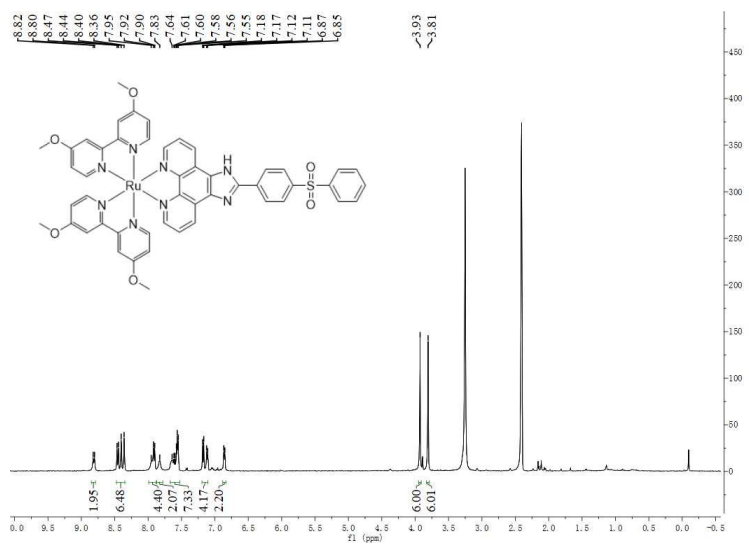

Figure 10.  $^1\text{H}$  NMR spectrum of the Ru(II)-3.

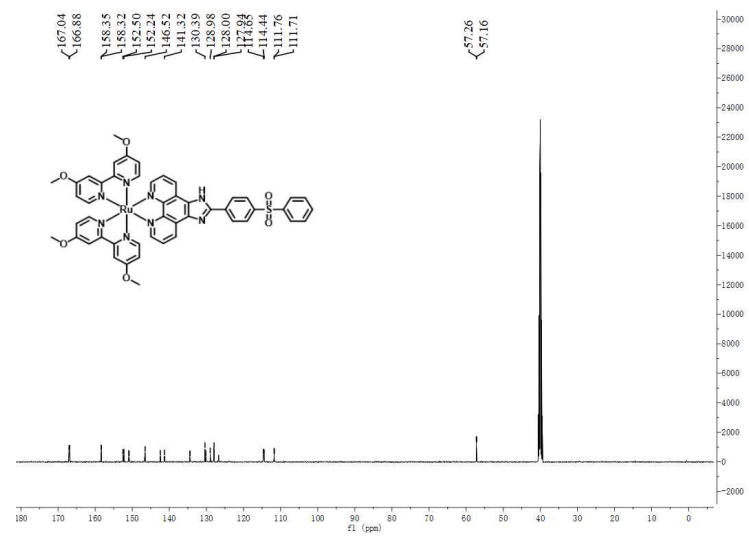

Figure 11.  $^{13}\text{C}$  NMR spectrum of the Ru(II)-3.

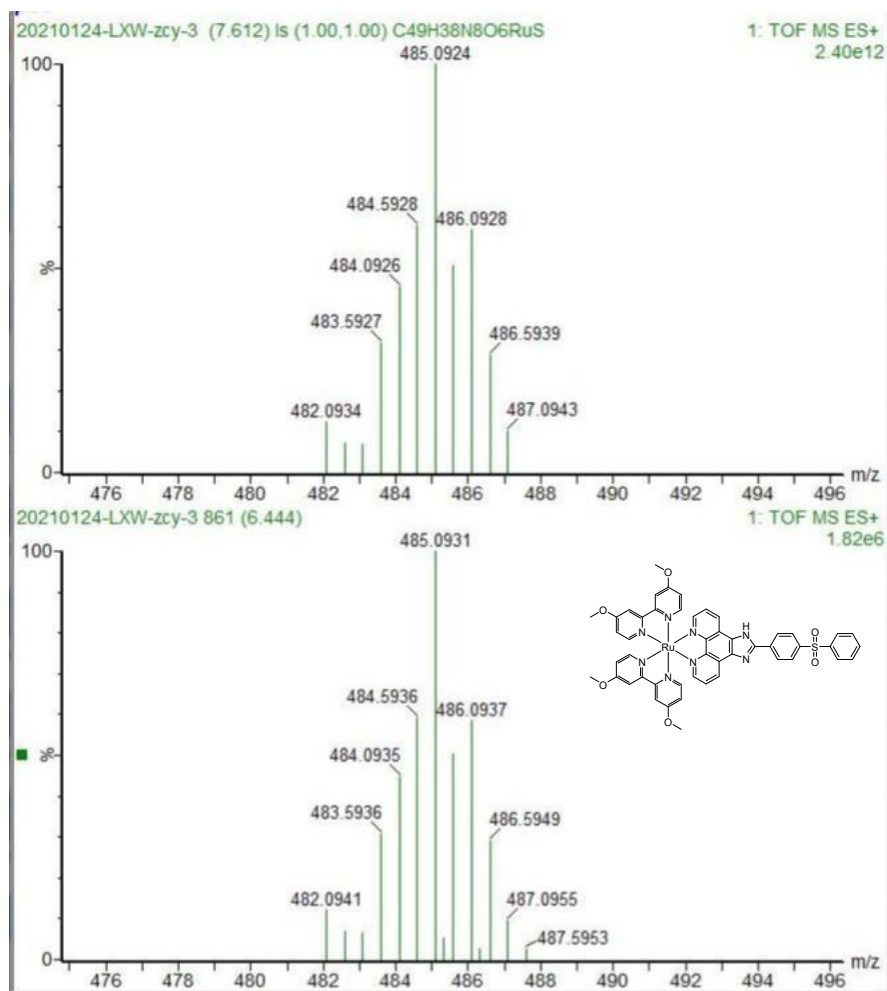

Figure 12. HRESI-MS spectrum of the Ru(II)-3.

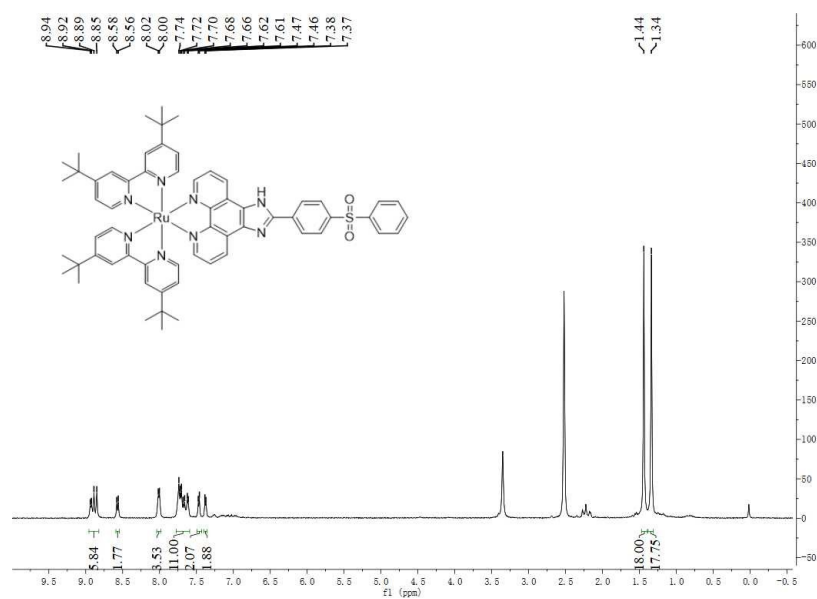

Figure 13. <sup>1</sup>H NMR spectrum of the Ru(II)-4.

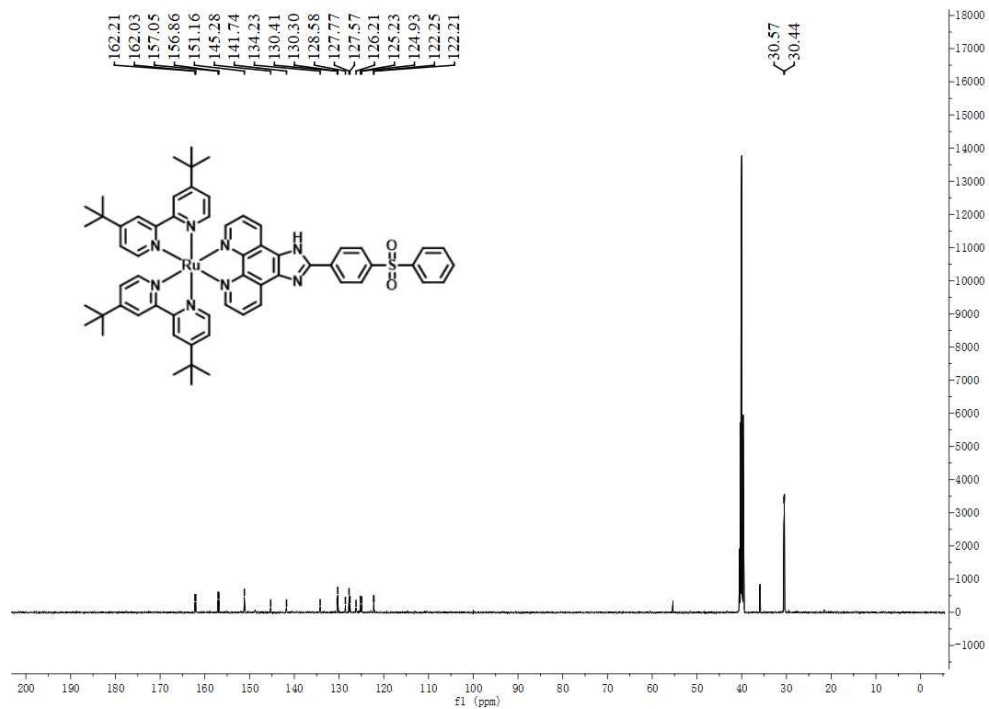

**Figure 14.**  $^{13}\text{C}$  NMR spectrum of the Ru(II)-4.

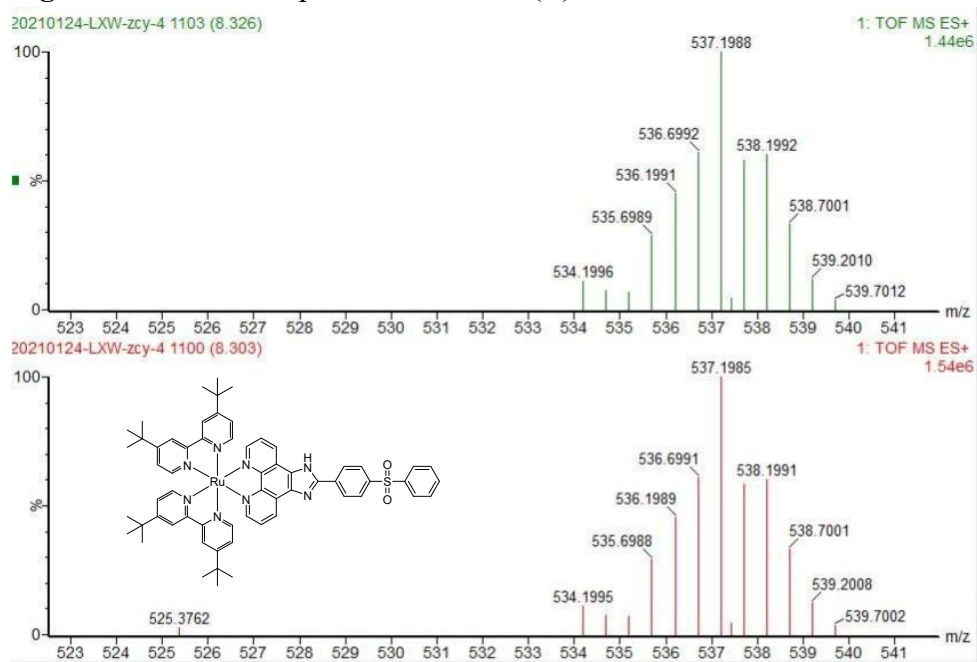

**Figure 15.** HRESI-MS spectrum of the Ru(II)-4.



## 2. Supporting Results

**Table S1** Minimum inhibitory concentrations of the four auxiliary ligands

| Compound                                                          | MIC against <i>S. aureus</i> ( $\mu\text{g/mL}$ ) |
|-------------------------------------------------------------------|---------------------------------------------------|
| $[\text{Ru}(\text{bpy})_2\text{Cl}_2] \cdot 2\text{H}_2\text{O}$  | >200                                              |
| $[\text{Ru}(\text{dmb})_2\text{Cl}_2] \cdot 2\text{H}_2\text{O}$  | >200                                              |
| $[\text{Ru}(\text{dmob})_2\text{Cl}_2] \cdot 2\text{H}_2\text{O}$ | >200                                              |
| $[\text{Ru}(\text{dtbp})_2\text{Cl}_2] \cdot 2\text{H}_2\text{O}$ | >200                                              |
| $\text{Ru}(\text{dmb})_2(\text{PIP})(\text{PF}_6)_2$              | 25                                                |

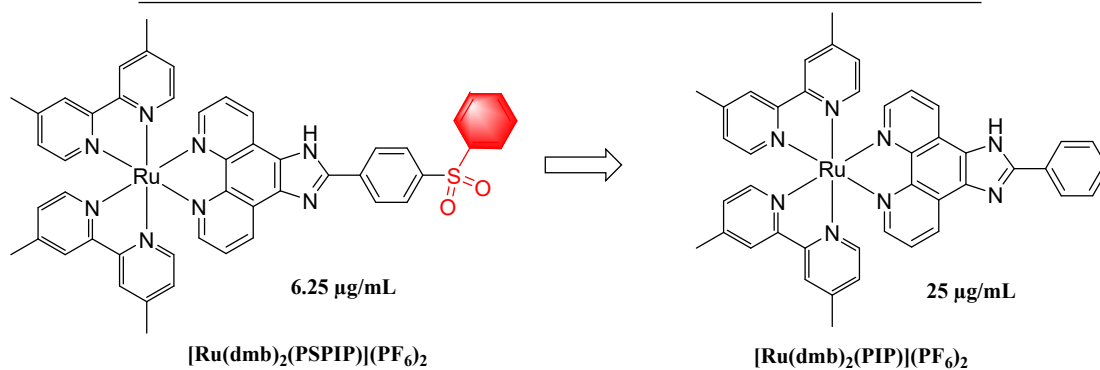

**Figure S16** Antimicrobial activity of ruthenium complexes with or without sulfonyl groups
